# Supplementary material for: Li7La3Zr2O12 ceramic nanofiber-incorporated composite polymer electrolytes for lithium metal batteries
Source: Royal Society of Chemistry journal article supplement (doi:10.1039/c8ta11449h), 2019-01-01
Supplement: c8ta11449h1.pdf [file c8ta11449h1.pdf]

## Supplementary Information

# Li<sub>7</sub>La<sub>3</sub>Zr<sub>2</sub>O<sub>12</sub> ceramic nanofiber-incorporated composite polymer electrolytes for lithium metal batteries

*Yang Li,<sup>†</sup> Wei Zhang,<sup>†</sup> Qianqian Dou, Ka Wai Wong and Ka Ming Ng<sup>\*</sup>*

Department of Chemical and Biological Engineering, The Hong Kong University of Science and Technology, Clear Water Bay, Hong Kong 999077, China.

\*Corresponding Author: Ka Ming Ng (kekmng@ust.hk), Fax: +852-23580054; Tel: +852-23587238

<sup>†</sup>The authors contributed equally.

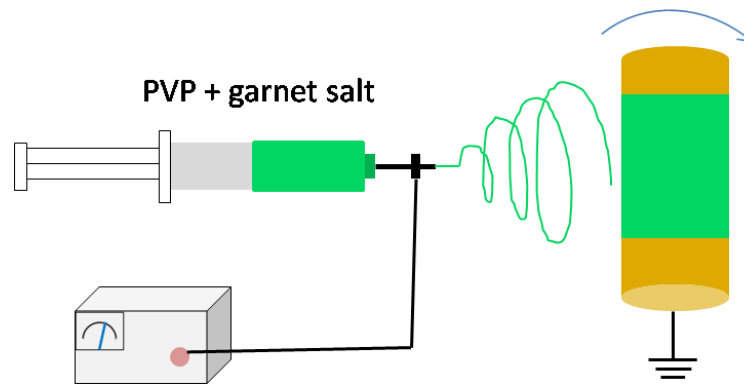

**Scheme S1.** Schematic electrospinning setup of garnet-PVP nanofibers.

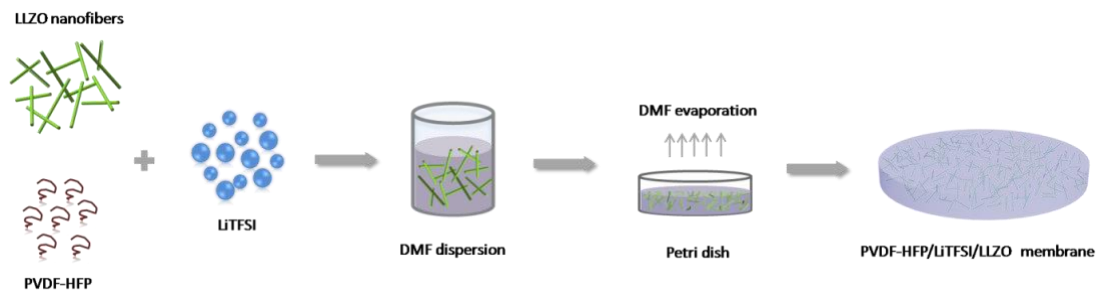

**Scheme S2.** Schematic procedure for the fabrication of the PVDF-HFP/LiTFSI/LLZO membranes.

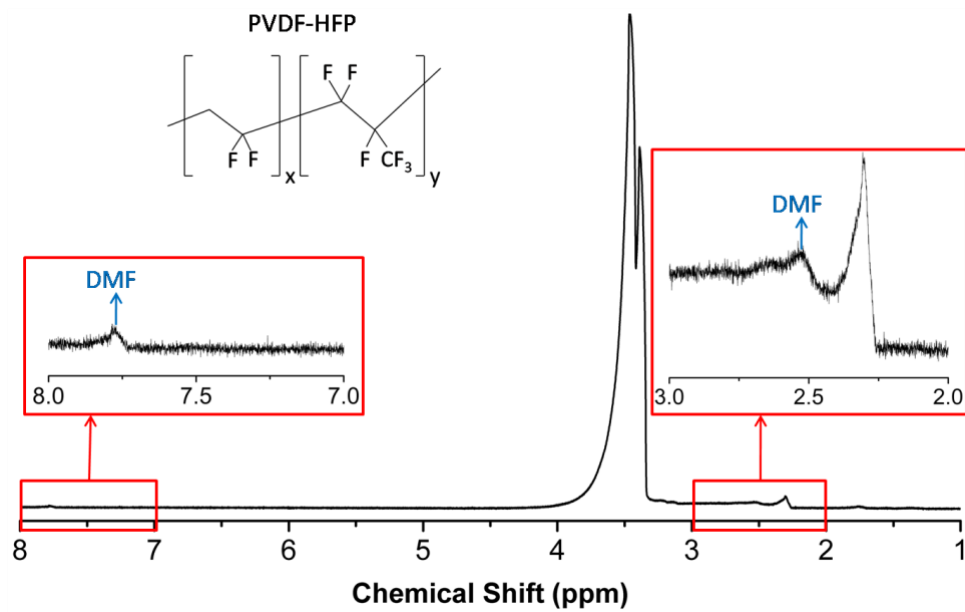

**Fig. S1.**  $^1\text{H}$  NMR measurement of PVDF-HFP/LiTFSI/LLZO membrane.

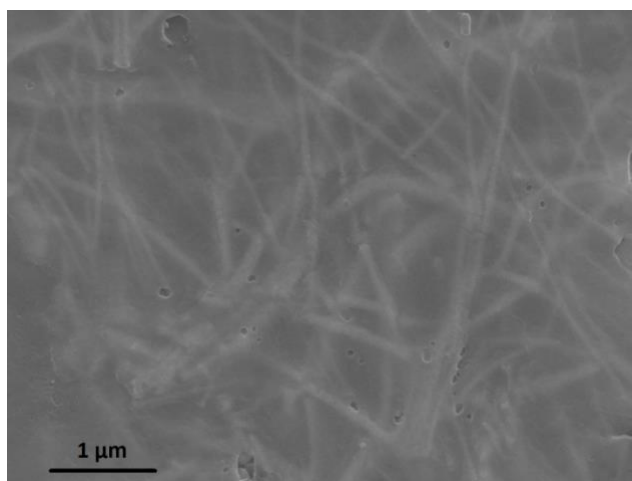

**Fig. S2.** SEM image of the PVDF-HFP/LiTFSI/LLZO membrane with 20 wt% LLZO nanofibers.

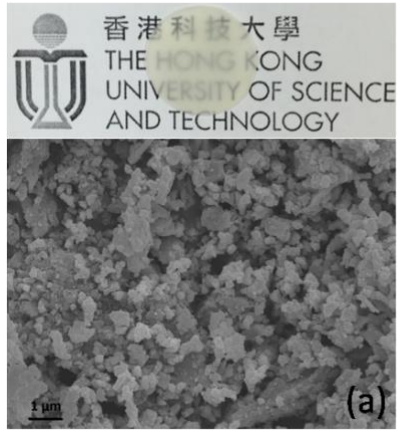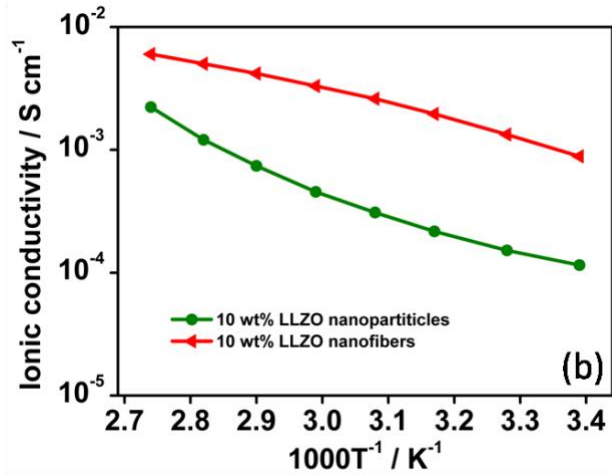

**Fig. S3.** (a) SEM image of LLZO nanoparticles, and photo of PVDF-HFP-based electrolyte with LLZO nanoparticles. (b) Comparison of ionic conductivity of CPEs containing LLZO nanofibers and LLZO nanoparticles.

**Table S1.** Liquid electrolyte uptakes in PVDF-HFP/LiTFSI/LLZO CPEs.

| Sample | W <sub>0</sub> (g) | W <sub>1</sub> (g) | Uptake |
|--------|--------------------|--------------------|--------|
| 1      | 0.072              | 0.08               | 11.1%  |
| 2      | 0.067              | 0.074              | 10.4%  |
| 3      | 0.075              | 0.082              | 9.3%   |

Liquid electrolyte uptakes were measured by weighting method. First, the dry PVDF-HFP/LiTFSI/LLZO CPE membranes were cut into round pieces and weighted as W<sub>0</sub>. After soaked in PC/LiTFSI liquid electrolyte solution for 20 min, the excess electrolyte solution on the surface of the membranes was removed by wiping with a tissue paper, and then weighted as W<sub>1</sub>. The liquid uptake is calculated by the following equation:

$$\text{Uptake (\%)} = (W_1 - W_0) / W_0 \times 100\%$$

**Table S2.** A comparison of ionic conductivities and mechanic properties of PVDF or PVDF-based gel or solid polymer electrolytes (GPE or SPE) from representative works and ours.<sup>1-8</sup>

|            | <b>Electrolyte</b>                      | <b>Liquid electrolyte uptake (%)</b> | <b>Ionic conductivity (mS cm<sup>-1</sup>)</b> | <b>Stress (MPa)/ Stress (%)</b> |
|------------|-----------------------------------------|--------------------------------------|------------------------------------------------|---------------------------------|
|            | PVDF-HFP/LLZO                           | 10                                   | 0.95                                           | 5.3/25                          |
| <b>GPE</b> | PVDF/cellulose                          | 267                                  | 1.33                                           | 2.83/5.92                       |
|            | PVDF-HFP/Al <sub>2</sub> O <sub>3</sub> | 371                                  | 0.7                                            | 17/20                           |
|            | PVDF-HFP/TiO <sub>2</sub>               | 125                                  | 0.98                                           | 9.69/74.4                       |
|            | PVDF-HFP/BaTiO <sub>3</sub>             | 462                                  | 0.104                                          | —/—                             |
|            | PVDF-HFP/PEO/GO                         | 368                                  | 2.1                                            | —/—                             |
|            | PVDF-HFP/PEO/PMMA                       | 75                                   | 0.81                                           | —/—                             |
|            | PVDF/polymer-blend                      | 81                                   | 3.5                                            | —/—                             |
| <b>SPE</b> | PVDF/PMMA                               | 0                                    | 0.031                                          | —/—                             |
|            | PVDF-HFP                                | 0                                    | 0.078                                          | —/—                             |

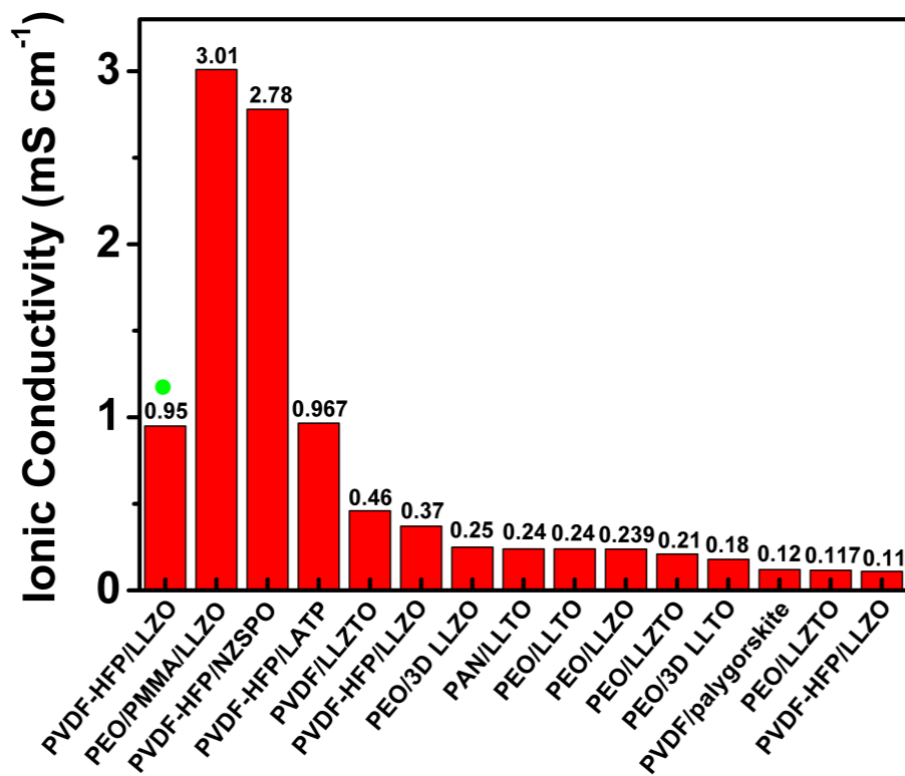

**Fig. S4.** A comparison of ionic conductivities of ceramic nanofiller-incorporated composite polymer electrolytes from representative works and ours.<sup>9-22</sup>

## References

- 1 X. Zuo, X. Ma, J. Wu, X. Deng, X. Xiao, J. Liu and J. Nan, *Electrochim. Acta*, 2018, **271**, 582–590.
- 2 S. Ali, C. Tan, M. Waqas, W. Lv, Z. Wei, S. Wu, B. Boateng, J. Liu, J. Ahmed and J. Xiong, *Adv. Mater. Interfaces*, 2018, **5**, 1701147.
- 3 Z. Li, H. Zhang, P. Zhang, Y. Wu and X. Zhou, *J. Power Sources*, 2008, **184**, 562–565.
- 4 P. Raghavan, X. Zhao, J. K. Kim, J. Manuel, G. S. Chauhan, J. H. Ahn and C. Nah, *Electrochim. Acta*, 2008, **54**, 228–234.
- 5 G. Chen, F. Zhang, Z. Zhou, J. Li and Y. Tang, *Adv. Energy Mater.*, 2018, **8**, 1801219.
- 6 J. Shi, Y. Yang and H. Shao, *J. Membr. Sci.*, 2018, **547**, 1–10.
- 7 C. Costa, J. G. Ribelles, S. Lanceros-Méndez, G. Appetecchi and B. Scrosati, *J. Power Sources*, 2014, **245**, 779–786.
- 8 C. M. Costa, M. M. Silva and S. Lanceros-Mendez, *RSC Adv.*, 2013, **3**, 11404–11417.
- 9 H. Li, M. Li, S. H. Siyal, M. Zhu, J.L. Lan, G. Sui, Y. Yu, W. Zhong and X. Yang, *J. Membr. Sci.*, 2018, **555**, 169–176.
- 10 Q. Yi, W. Zhang, S. Li, X. Li and C. Sun, *ACS Appl. Mater. Interfaces*, 2018, **10**, 35039–35046.
- 11 X. Shi, N. Ma, Y. Wu, Y. Lu, Q. Xiao, Z. Li and G. Lei, *Solid State Ionics*, 2018, **325**, 112–119.
- 12 X. Zhang, T. Liu, S. Zhang, X. Huang, B. Xu, Y. Lin, B. Xu, L. Li, C. W. Nan and Y. Shen, *J. Am. Chem. Soc.*, 2017, **139**, 13779–13785.
- 13 Y. Liang, S. Deng, Y. Xia, X. Wang, X. Xia, J. Wu, C. Gu and J. Tu, *Mater. Res. Bull.*, 2018, **102**, 412–417.
- 14 K. K. Fu, Y. Gong, J. Dai, A. Gong, X. Han, Y. Yao, C. Wang, Y. Wang, Y. Chen and C. Yan, *Proc. Natl Acad. Sci.*, 2016, **113**, 7094–7099.
- 15 W. Liu, N. Liu, J. Sun, P. C. Hsu, Y. Li, H. W. Lee and Y. Cui, *Nano Lett.*, 2015, **15**, 2740–2745.
- 16 P. Zhu, C. Yan, M. Dirican, J. Zhu, J. Zang, R. K. Selvan, C. C. Chung, H. Jia, Y. Li and Y. Kiyak, N. Wu, X. Zhang, *J. Mater. Chem. A*, 2018, **6**, 4279–4285.

- 17 Z. Wan, D. Lei, W. Yang, C. Liu, K. Shi, X. Hao, L. Shen, W. Lv, B. Li, Q. Yang, F. Kang and Y. He, *Adv. Funct. Mater.*, 2018, 1805301.
- 18 J. Zhang, N. Zhao, M. Zhang, Y. Li, P. K. Chu, X. Guo, Z. Di, X. Wang and H. Li, *Nano Energy*, 2016, **28**, 447–454.
- 19 X. Wang, Y. Zhang, X. Zhang, T. Liu, Y. H. Lin, L. Li, Y. Shen and C. W. Nan, *ACS Appl. Mater. Interfaces*, 2018, **10**, 24791–24798.
- 20 P. Yao, B. Zhu, H. Zhai, X. Liao, Y. Zhu, W. Xu, Q. Cheng, C. Jayyosi, Z. Li and J. Zhu, K. M. Myers, X. Chen and Y. Yang, *Nano Lett.*, 2018, **18**, 6113–6120.
- 21 L. Chen, Y. Li, S. P. Li, L. Z. Fan, C. W. Nan, J. B. Goodenough, *Nano Energy*, 2018, **46**, 176–184.
- 22 W. Zhang, J. Nie, F. Li, Z. L. Wang and C. Sun, *Nano Energy*, 2018, **45**, 413–419.
